# Supplementary material
Source: PubMed Central journal article supplement (PMC4635499)
Supplement: vir-96-09-2764-s001.pdf [file vir-96-09-2764-s001.pdf]

### Supplementary Tables:

| Name               | Sequence (5' – 3')                                      | Ta    |
|--------------------|---------------------------------------------------------|-------|
| E5 HindIII forward | GAC <b>AAG CTT</b> GTG TAC TAT <b>GCC</b> AAA TCT ATG   | 60 °C |
| E5 XhoI reverse    | TCG <b>CTC GAG</b> CGA AGG CAT <b>TAA</b> AAG GG        | 60 °C |
| E6 HindIII forward | TCC <b>CAA GCT</b> TGG GCA <b>CAT GGA</b> CCT GAA A     | 61 °C |
| E6 EcoRI reverse   | CCG <b>GGA ATT CCC</b> AAG TTT <b>CTA</b> TGG GTA TTT G | 61 °C |
| GAPDH forward      | TGA AGG TCG GTG TGA ACG GAT TTG GC                      | 60 °C |
| GAPDH reverse      | CAT GTA GGC CAT GAG GTC CAC CAC                         | 60 °C |

**Table S1.** Primer sequences and annealing temperatures. Bold letters represent start and stop codons. Bold and italic letters represent restriction sites.

| Name              | Sequence (5' – 3')                                                                                                                                                                                                                                                                                                                                                                                                                                                                                                                                                                                 |
|-------------------|----------------------------------------------------------------------------------------------------------------------------------------------------------------------------------------------------------------------------------------------------------------------------------------------------------------------------------------------------------------------------------------------------------------------------------------------------------------------------------------------------------------------------------------------------------------------------------------------------|
| E5-pCEP4          | <b>AAGCTT</b> GTGTA <b>CTATG</b> CCAAATCTATGGTTTCTATTGTTCTTGGGACTAGTTGC<br>TGCAATGCAACTGCTGCTATTACTGTTCTTACTCTTGTTTTTTCTTGTATACTGG<br>GATCATTTTGAGTGCTCCTGTACAGGTCTGCCCTTT <b>TAAT</b> GCCTTCG <b>CTCGAG</b>                                                                                                                                                                                                                                                                                                                                                                                       |
| E6-<br>pZeoSV2(+) | <b>AAGCTT</b> GCCAC <b>CATG</b> GACCTGAAACCTTTTGCAAGAGCGTTTAACTTAAGCTT<br>GCCACCATGGACCTGAAACCTTTTGCAAGAACCAATCCATTCTCAGGGTTGGA<br>CTGTCTGTGGTGCAGAGAGCCTCTTACAGAAGTTGATGCTTTTAGGTGCATGG<br>TCAAAGACTTTTCATGTTGTAATTCGGGAAGGCTGTAGATATGGTGCATGTACCA<br>TTTGTCTTGAAA <b>ACTGTT</b> AGCTACTGAAAGAAGACTTTGGCAAGGTGTTCCAG<br>TAACAGGTGAGGAAGCTGAATTATTGCATGGCAAACACTTGATAGGCTTTGC<br>ATAAGATGCTGCTACTGTGGGGGCAA <b>ACTAACAAAAAATGAAAAACATCGGCA</b><br>TGTGCTTTTT <b>AATGAGC</b> TTTTCTGCAAACCAGAGCTAACATAATTAGAGGACG<br>CTGCTACGACTGCTGCAGACATGGTTCAAGGTCCAAATACCCAT <b>AGAACTTG</b><br><b>GGAATTC</b> |

**Table S2.** Sequences of genes incorporated in mammalian vectors. Bold letters represent start and stop codons. Bold and italic letters represent restriction sites.
